# Supplementary material for: Emissions of Fungal Volatile Organic Compounds in Residential Environments and Temporal Emission Patterns: Implications for Sampling Methods
Source: Int J Environ Res Public Health. 2022 Oct 2;19(19):12601. doi: 10.3390/ijerph191912601 (PMC9564960; doi:10.3390/ijerph191912601)
Supplement: Supplementary file 1 [file ijerph-19-12601-s001.zip › mVOCs emission_SI_Table S3-S6.xlsx]

## Sheet: Table S3
Table S3. Detection of compounds from Aspergillus niger and the summary statistics in their emission.
Detection	Compounds	MEA				Wall paper				Silicone
		DF (%) 1	Total emission (μg/c.p. 2)	GM 3 (μg/3 days)	GSD 4 (μg/3 days)	DF (%) 1	Total emission (μg/c.p. 2)	GM 3 (μg/3 days)	GSD 4 (μg/3 days)	DF (%) 1	Total emission (μg/c.p. 2)	GM 3 (μg/3 days)	GSD 4 (μg/3 days)
Detected from all 3 growth media	1,1,2,2-Tetrachloroethane	100	32.29	3.17	1.75	70	0.99	0.15	1.61	100	34.91	3.37	1.85
	Ethyl methacrylate	40	-	-	-	80	1.68	0.15	2.3	100	72.45	5.11	2.96
	Ethylene dichloride	100	9.42	0.84	1.82	80	1.86	0.16	2.97	91	20.16	2.25	1.57
	Methyl isobutyrate	50	2.78	0.51	1.63	50	0.51	0.08	1.89	91	29.86	3.13	1.89
	Methyl methacrylate	100	9.16	0.76	2.32	90	13.61	1.25	1.85	73	195.61	29.09	1.53
	Methyl propionate	30	-	-	-	10	-	-	-	82	5.12	0.64	1.66
Detected from 2 growth media	2-Ethyl-1-hexene	10	-	-	-	-	-	-	-	100	3	0.27	2.02
	2-Heptene	40	-	-	-	-	-	-	-	82	0.92	0.1	2.33
	2-Methyl-1-pentene	20	-	-	-	-	-	-	-	9	-	-	-
	Benzene	60	1.16	0.13	2.49	-	-	-	-	91	1.86	0.2	1.88
	cis-3-Heptene	40	-	-	-	-	-	-	-	55
	Ethanol	-	-	-	-	30	-	-	-	73	37.04	0.74	7.3
	Ethylbenzene	10	-	-	-	-	-	-	-	100	102.05	9.25	2.02
	Isobutyronitrile	80	1.83	0.19	1.9	-	-	-	-	91	2.7	0.3	1.61
	Methylacrylonitrile	70	4.01	0.31	3.52	-	-	-	-	64	2.09	0.33	1.84
	o-Xylene	20	-	-	-	-	-	-	-	27
	Styrene	100	5.14	0.53	1.53	-	-	-	-	100	29.91	2.65	2.1
	Toluene	90				-	-	-	-	100	15.03	1.21	2.46
Detected from 1 growth medium	1-(2-Aminophenyl) ethan-1-oneoxime	-	-	-	-	-	-	-	-	36	-	-	-
	1,2,3-Trimethylbenzene	-	-	-	-	-	-	-	-	9	-	-	-
	1,4-Dimethylcyclohexene	-	-	-	-	-	-	-	-	9	-	-	-
	1-Butanol	-	-	-	-	-	-	-	-	91	14.49	1.09	3.38
	1-Ethyl-3-methylcyclopentane	-	-	-	-	-	-	-	-	36	-	-	-
	1-Ethyl-3-methyl-cyclopentane	-	-	-	-	-	-	-	-	18	-	-	-
	1-Ethylcyclohexene	-	-	-	-	-	-	-	-	36	-	-	-
	1-Heptene	-	-	-	-	-	-	-	-	36	-	-	-
	1-Methoxy-2-propanol	-	-	-	-	-	-	-	-	18	-	-	-
	1-Phenylethanol	-	-	-	-	-	-	-	-	27	-	-	-
	2,2,3,3-Tetramethyl butanedinitrile	-	-	-	-	-	-	-	-	100	14.63	1.37	1.93
	2,2,4-Trimethyl-1,3-pentanedioldiisobutyrate	-	-	-	-	-	-	-	-	18	-	-	-
	2,3-Dimethylbutyl alcohol	-	-	-	-	-	-	-	-	18	-	-	-
	2,4,4-Trimethyl-1,3-pentanediol 1-isobutyrate	-	-	-	-	-	-	-	-	45	-	-	-
	2,4-Di-tert-butylphenol	-	-	-	-	-	-	-	-	9	-	-	-
	2,5-Dimethylcyclopentanone	-	-	-	-	-	-	-	-	18	-	-	-
	2-Butanone	-	-	-	-	-	-	-	-	36	-	-	-
	2-Butenoicacid methylester	-	-	-	-	-	-	-	-	73	153.92	1.58	29.2
	2-Butoxyethanol	-	-	-	-	-	-	-	-	100	83.4	7.83	1.87
	2-Enylbenzene	-	-	-	-	-	-	-	-	100	12.96	1.14	2.09
	2-Ethyl-1-hexanol	-	-	-	-	-	-	-	-	91	235.82	26.63	1.65
	2-Ethylhexyl acetate	-	-	-	-	-	-	-	-	100	38.66	3.88	1.63
	2-Ethylhexyl acrylate	-	-	-	-	-	-	-	-	27	-	-	-
	2-Ethylhexyl propionate	-	-	-	-	-	-	-	-	82	14.2	1.83	1.51
	2-Heptene	-	-	-	-	-	-	-	-	9	-	-	-
	2-Methyl-1-hexene	-	-	-	-	-	-	-	-	9	-	-	-
	2-Methyl-1-pentanol	-	-	-	-	-	-	-	-	100	6.69	0.6	2.07
	2-Methyl-3-pentanone	-	-	-	-	-	-	-	-	9	-	-	-
	2-Methylcyclopentanone	-	-	-	-	-	-	-	-	64	0.17	0.03	3.26
	2-Methylpyrazine	-	-	-	-	-	-	-	-	9	-	-	-
	2-Octene	-	-	-	-	-	-	-	-	9	-	-	-
	2-Propanol	-	-	-	-	-	-	-	-	27	-	-	-
	2-Vinyltoluene	-	-	-	-	-	-	-	-	9	-	-	-
	3-Butenenitrile	-	-	-	-	-	-	-	-	18	-	-	-
	3-Heptene	20	-	-	-	-	-	-	-	-	-	-	-
	3-Heptene	-	-	-	-	-	-	-	-	18	-	-	-
	3-Methyl-2-heptene	-	-	-	-	-	-	-	-	64	0.88	0.14	1.98
	3-Methyl-4-heptanone	-	-	-	-	-	-	-	-	73	0.84	0.1	2.64
	3-Octene	-	-	-	-	-	-	-	-	18	-	-	-
	4-Ethyltoluene	-	-	-	-	-	-	-	-	18	-	-	-
	4-Methyl-2-pentanone	-	-	-	-	-	-	-	-	18	-	-	-
	4-Methylstyrene	-	-	-	-	-	-	-	-	18	-	-	-
	6-Methylheptyl acrylate	-	-	-	-	-	-	-	-	73	36.36	4.55	1.63
	Acetophenone	-	-	-	-	-	-	-	-	91	1.22	0.11	1.96
	Athyl acetate	-	-	-	-	-	-	-	-	9	-	-	-
	Benzaldehyde	-	-	-	-	-	-	-	-	27	-	-	-
	Butyl butanoate	-	-	-	-	-	-	-	-	18	-	-	-
	Butyldiglycol	-	-	-	-	-	-	-	-	27	-	-	-
	Chlorobenzene	-	-	-	-	-	-	-	-	27	-	-	-
	Chloroform	-	-	-	-	10	-	-	-	-	-	-	-
	Cumene	-	-	-	-	-	-	-	-	100	15.62	1.45	1.93
	Cyclopropylbenzene	-	-	-	-	-	-	-	-	27	-	-	-
	Dichloromethane	-	-	-	-	-	-	-	-	45	-	-	-
	Dimethylaminoacetonitrile	-	-	-	-	-	-	-	-	91	0.74	0.08	1.86
	Dodecane	-	-	-	-	-	-	-	-	18	-	-	-
	Ethyl 2-methylpropanoate	-	-	-	-	-	-	-	-	91	2.01	0.16	3.13
	Ethyl acrylate	-	-	-	-	-	-	-	-	55	3.32	0.56	2.65
	Ethylcyclohexene	-	-	-	-	-	-	-	-	18	-	-	-
	Hexane	-	-	-	-	-	-	-	-	9	-	-	-
	Isopropanol	-	-	-	-	-	-	-	-	18	-	-	-
	Isopropyl methacrylate	-	-	-	-	-	-	-	-	27	-	-	-
	Methyl 2-methyl-3-butenoate	-	-	-	-	-	-	-	-	36	-	-	-
	Methyl 3-methyl-2-butenoate	-	-	-	-	-	-	-	-	100	1.05	0.1	1.84
	Methyl 3-methyl-3-butenoate	-	-	-	-	-	-	-	-	18	-	-	-
	Methyl 4-pentenoate	-	-	-	-	-	-	-	-	9	-	-	-
	Methyl acrylate	-	-	-	-	-	-	-	-	91	5.31	0.58	1.74
	Methyl crotonate	-	-	-	-	-	-	-	-	27	-	-	-
	Methyl DL-2-methylbutyrate	-	-	-	-	-	-	-	-	100	5.28	0.5	1.82
	Methyl mandelate	-	-	-	-	-	-	-	-	9	-	-	-
	Methyl tiglate	-	-	-	-	-	-	-	-	73	1.12	0.15	2.06
	Methyl trimethylacetate	-	-	-	-	-	-	-	-	73	2.64	0.38	1.6
	m-Xylene	-	-	-	-	-	-	-	-	18	-	-	-
	n-Decane	-	-	-	-	-	-	-	-	100	2.99	0.28	2
	Nitrophenyloxadiazolol	60	-	-	-	-	-	-	-	-	-	-	-
	n-Methylmethanethioamide	-	-	-	-	-	-	-	-	9	-	-	-
	n-Octane	-	-	-	-	-	-	-	-	91	11.25	1.19	1.81
	n-Propyl methacrylate	-	-	-	-	-	-	-	-	9	-	-	-
	o-Methylformaldoxime	-	-	-	-	-	-	-	-	9	-	-	-
	Phenylacetylene	-	-	-	-	-	-	-	-	45	-	-	-
	Propenylbenzene	-	-	-	-	-	-	-	-	73	5.68	0.76	1.99
	Propylbenzene	-	-	-	-	-	-	-	-	100	6.05	0.56	1.96
	Propylcyclopentane	-	-	-	-	-	-	-	-	18	-	-	-
	p-Xylene	-	-	-	-	-	-	-	-	36	-	-	-
	Pyrazine	-	-	-	-	-	-	-	-	9	-	-	-
	Pyrimidine	-	-	-	-	-	-	-	-	9	-	-	-
	Salicylaldehyde	-	-	-	-	-	-	-	-	27	-	-	-
	Tetrachloroethylene	-	-	-	-	-	-	-	-	27	-	-	-
	trans-Methyl crotonate	-	-	-	-	-	-	-	-	82	1.7	0.21	1.7
	Trichloroethylene	-	-	-	-	-	-	-	-	91	2.37	0.27	1.62
	Xylene	-	-	-	-	-	-	-	-	9	-	-	-
Note: Compounds were presented in the table in alphabetical order. Summary statistics were not provided in case that compounds were detected in less than 50% of samples.
1. Detection frequency.
2. Culture period.
3. Geometric mean.
4. Geometric standard deviation.

## Sheet: Table S4
Table S4. Detection of compounds from Alternaria alternata and the summary statistics in their emission.
Detection	Compounds	MEA				Wall paper				Silicone
		DF (%) 1	Total emission (μg/c.p. 2)	GM 3 (μg/3 days)	GSD 4 (μg/3 days)	DF (%) 1	Total emission (μg/c.p. 2)	GM 3 (μg/3 days)	GSD 4 (μg/3 days)	DF (%) 1	Total emission (μg/c.p. 2)	GM 3 (μg/3 days)	GSD 4 (μg/3 days)
Detected from all 3 growth media	Ethylene dichloride	90	5.23	0.57	1.96	70	0.39	0.04	3.09	91	2.17	0.18	1.93
	Methyl methacrylate	70	1.35	0.19	1.74	100	2.79	0.25	2.12	91	14.03	1.24	1.7
Detected from 2 growth media	1,1,2,2-Tetrachloroethane	90	8.63	1.03	1.38	-	-	-	-	91
	Benzene	70	0.26	0.04	2.05	-	-	-	-	91
	Dichloromethane	10	-	-	-	-	-	-	-	18	-	-	-
	Ethanol	-	-	-	-	20	-	-	-	73
	Ethyl methacrylate	-	-	-	-	10	-	-	-	82	0.6	0.07	1.6
	Toluene	50				-	-	-	-	55
	Styrene	90	5.18	0.57	1.79	-	-	-	-	64
Detected from 1 growth medium	1-(2-Aminophenyl) ethan-1-oneoxime	-	-	-	-	-	-	-	-	45	-	-	-
	1,3,5,7-Cyclooctate traene	-	-	-	-	-	-	-	-	9	-	-	-
	1-Butanol	-	-	-	-	-	-	-	-	73	0.44	0.04	2.61
	2-Butoxyethanol	-	-	-	-	-	-	-	-	64	1.66	0.21	1.75
	2-Ethyl-1-hexanol	-	-	-	-	-	-	-	-	82	4.36	0.41	1.92
	2-Ethyl-1-hexene	-	-	-	-	-	-	-	-	18	-	-	-
	2-Heptene	50	0.49	0.09	1.42	-	-	-	-	-	-	-	-
	3-Heptene	10	-	-	-	-	-	-	-	-	-	-	-
	3-Methoxyphenothiazin	-	-	-	-	-	-	-	-	9	-	-	-
	3-Methylstyrene	-	-	-	-	-	-	-	-	9	-	-	-
	4-Methylstyrene	-	-	-	-	-	-	-	-	9	-	-	-
	Benzaldehyde	-	-	-	-	-	-	-	-	18	-	-	-
	Bicycloocta-1,3,5-triene	-	-	-	-	-	-	-	-	18	-	-	-
	Butyldiglycol	-	-	-	-	-	-	-	-	9	-	-	-
	Chloroform	-	-	-	-	-	-	-	-	36	-	-	-
	cis-3-Heptene	30	-	-	-	-	-	-	-	-	-	-	-
	Cumene	-	-	-	-	-	-	-	-	73
	Dimethyl disulfide	20	-	-	-	-	-	-	-	-	-	-	-
	Ethyl acrylate	-	-	-	-	-	-	-	-	18	-	-	-
	Ethylbenzene	-	-	-	-	-	-	-	-	91
	Isobutyronitrile	30	-	-	-	-	-	-	-	-	-	-	-
	Isoprene	10	-	-	-	-	-	-	-	-	-	-	-
	Isopropanol	-	-	-	-	-	-	-	-	91	1.15	0.08	2.07
	Methyl isobutyrate	-	-	-	-	-	-	-	-	82	0.39	0.03	2.75
	Methyl propionate	-	-	-	-	-	-	-	-	45	-	-	-
	Methylacrylonitrile	30	-	-	-	-	-	-	-	-	-	-	-
	Nitrophenyloxadiazolol	50				-	-	-	-	-	-	-	-
	n-Octadecane	-	-	-	-	-	-	-	-	9	-	-	-
	n-Octane	-	-	-	-	-	-	-	-	73	0.22	0.02	2.01
	o-Xylene	-	-	-	-	-	-	-	-	9	-	-	-
	prop-2-enylbenzene	-	-	-	-	-	-	-	-	73
	Propane-1,2-diol	-	-	-	-	-	-	-	-	27	-	-	-
	Propenylbenzene	-	-	-	-	-	-	-	-	36	-	-	-
	Trichloroethylene	-	-	-	-	-	-	-	-	64	0	0	1.33
Note: Compounds were presented in the table in alphabetical order. Summary statistics were not provided in case that compounds were detected in less than 50% of samples.
1. Detection frequency.
2. Culture period.
3. Geometric mean.
4. Geometric standard deviation.

## Sheet: Table S5
Table S5. Detection of compounds from Penicillium chrysogenum and the summary statistics in their emission.
Detection	Compounds	MEA				Wall paper				Silicone
		DF (%) 1	Total emission (μg/c.p. 2)	GM 3 (μg/3 days)	GSD 4 (μg/3 days)	DF (%) 1	Total emission (μg/c.p. 2)	GM 3 (μg/3 days)	GSD 4 (μg/3 days)	DF (%) 1	Total emission (μg/c.p. 2)	GM 3 (μg/3 days)	GSD 4 (μg/3 days)
Detected from all 3 growth media	1,1,2,2-Tetrachloroethane	100	31.2	3.39	1.27	100	10.56	0.94	1.71	91	31.53	2.95	1.48
	Benzene	90	0.67	0.07	1.6	41	-	-	-	91	0.94	0.08	2.09
	Ethyl methacrylate	30	-	-	-	100	12.46	0.86	3.08	91	3.87	0.36	1.49
	Ethylene dichloride	100	6.4	0.7	1.26	100	2.83	0.23	2.17	91	12.58	0.85	2.98
	Isobutyronitrile	90	1.92	0.16	2.59	50	0.35	0.07	1.46	91
	Methyl isobutyrate	100	30.25	2.46	2.05	100	6.79	0.61	1.72	91	19.02	1.68	1.68
	Methyl methacrylate	100	83.3	8.81	1.44	100	128.76	11.51	1.72	91	220.1	12.79	7.19
	Methylacrylonitrile	90	9.35	0.51	4.06	40	-	-	-	82	2.9	0.27	1.87
	Styrene	100	8.41	0.84	1.66	70	0.67	0.09	1.39	91
Detected from 2 growth media	1-Butanol	-	-	-	-	60	1.71	0.23	2.44	91	13.6	1.27	1.46
	2-Heptene	20	-	-	-	-	-	-	-	64	0.57	0.06	2.76
	cis-3-Heptene	40	-	-	-	-	-	-	-	64	0.52	0.05	2.89
	Dichloromethane	30	-	-	-	-	-	-	-	91	0.5	0.02	4.87
	Ethanol	-	-	-	-	80	5.33	0.23	4.36	91	22.15	1.39	2.27
	Ethyl acrylate	-	-	-	-	50	1.77	0.33	1.55	73	1.5	0.15	1.94
	Methyl acrylate	-	-	-	-	10	-	-	-	91	10.14	0.97	1.36
	Methyl propionate	-	-	-	-	100	7.43	0.44	2.6	91	19.72	1.71	1.77
	Methyl trimethylacetate	10	-	-	-	-	-	-	-	55	2.04	0.32	1.48
	Toluene	80				-	-	-	-	91	6.36	0.47	2.32
	trans-3-Heptene	20	-	-	-	-	-	-	-	9	-	-	-
	Trichloroethylene	-	-	-	-	70	3.68	0.31	2.95	91	4.18	0.39	1.53
Detected from 1 growth medium	1-(2-Aminophenyl) ethan-1-oneoxime	-	-	-	-	-	-	-	-	64	3.69	0.5	1.4
	1-Ethyl-3-methylcyclopentane	-	-	-	-	-	-	-	-	9	-	-	-
	1-Ethylcyclohexene	-	-	-	-	-	-	-	-	36	-	-	-
	1-Heptene	-	-	-	-	-	-	-	-	9	-	-	-
	1-Propanol	-	-	-	-	-	-	-	-	27	-	-	-
	2,2,3,3-Tetramethyl butanedinitrile	-	-	-	-	-	-	-	-	73	4.27	0.51	1.37
	2,4,4-Trimethyl-1,3-pentanediol 1-isobutyrate	-	-	-	-	-	-	-	-	9	-	-	-
	2,5-Dimethyl-2,4-hexadiene	-	-	-	-	-	-	-	-	9	-	-	-
	2,5-Dimethylcyclopentanone	-	-	-	-	-	-	-	-	18	-	-	-
	2-Butanone	-	-	-	-	-	-	-	-	9	-	-	-
	2-Butoxyethanol	-	-	-	-	-	-	-	-	91	33.22	3.02	1.6
	2-Ethyl-1-hexanol	-	-	-	-	-	-	-	-	91	108.46	9.89	1.61
	2-Ethyl-1-hexene	-	-	-	-	-	-	-	-	91	1.03	0.07	2.95
	2-Ethylacrolein	-	-	-	-	-	-	-	-	9	-	-	-
	2-Ethylhexyl acetate	-	-	-	-	-	-	-	-	91	14.44	1.34	1.54
	2-Ethylhexyl acrylate	-	-	-	-	-	-	-	-	27	-	-	-
	2-Ethylhexyl propionate	-	-	-	-	-	-	-	-	45	-	-	-
	2-Heptene	-	-	-	-	-	-	-	-	27	-	-	-
	2-Methyl-1-pentanol	-	-	-	-	-	-	-	-	91	1.67	0.13	2.2
	2-Methyl-1-pentene	10	-	-	-	-	-	-	-	-	-	-	-
	2-Methylcyclopentanone	-	-	-	-	-	-	-	-	64	0.09	0.01	2.15
	2-Propanol	-	-	-	-	-	-	-	-	64
	2-Vinyltoluene	-	-	-	-	-	-	-	-	9	-	-	-
	3,5-Dimethylcyclohexene	-	-	-	-	-	-	-	-	9	-	-	-
	3-Ethylcyclohexene	-	-	-	-	-	-	-	-	9	-	-	-
	3-Heptene	-	-	-	-	-	-	-	-	9	-	-	-
	3-Methyl-2-heptene	-	-	-	-	-	-	-	-	82	0.44	0.04	1.94
	3-Methyl-4-heptanone	-	-	-	-	-	-	-	-	18	-	-	-
	4,4-Dimethyl-trans-2-pentene	-	-	-	-	-	-	-	-	9	-	-	-
	6-Methylheptyl acrylate	-	-	-	-	-	-	-	-	64	11.57	1.52	1.6
	Acetophenone	-	-	-	-	-	-	-	-	45	-	-	-
	Benzaldehyde	-	-	-	-	-	-	-	-	91	12.36	1.05	1.85
	Butanal	-	-	-	-	-	-	-	-	55	0.83	0.12	1.83
	Chlorobenzene	-	-	-	-	-	-	-	-	9	-	-	-
	cis-1-Ethyl-3-methylcyclopentane	-	-	-	-	-	-	-	-	9	-	-	-
	Cumene	-	-	-	-	-	-	-	-	91	6.39	0.54	1.93
	Cyclopropylbenzene	-	-	-	-	-	-	-	-	9	-	-	-
	Dimethylaminoacetonitrile	-	-	-	-	-	-	-	-	82	0.42	0.04	1.66
	Ethyl 2-methylpropanoate	-	-	-	-	-	-	-	-	18	-	-	-
	Ethyl acetate	-	-	-	-	50	12.91	2.06	2.34	-	-	-	-
	Ethylbenzene	-	-	-	-	-	-	-	-	91	41.28	3.26	2.14
	Ethylcyclohexene	-	-	-	-	-	-	-	-	9	-	-	-
	Isopropanol	-	-	-	-	-	-	-	-	64	3.62	0.18	3.69
	Methyl 2-methyl-2-butenoate	-	-	-	-	-	-	-	-	9	-	-	-
	Methyl 2-methyl-3-butenoate	-	-	-	-	-	-	-	-	18	-	-	-
	Methyl 3-methyl-2-butenoate	-	-	-	-	-	-	-	-	91	0.28	0.03	1.55
	Methyl 3-methyl-3-butenoate	-	-	-	-	-	-	-	-	9	-	-	-
	Methyl 4-pentenoate	-	-	-	-	-	-	-	-	9	-	-	-
	Methyl crotonate	-	-	-	-	-	-	-	-	36	-	-	-
	Methyl DL-2-methylbutyrate	-	-	-	-	-	-	-	-	91	2.87	0.25	1.72
	Methyl isocrotonate	-	-	-	-	-	-	-	-	82	47.08	0.1	10.29
	Methyl tiglate	-	-	-	-	-	-	-	-	18	-	-	-
	Methyl-2-ethylacrylate	-	-	-	-	-	-	-	-	27	-	-	-
	m-Xylene	-	-	-	-	-	-	-	-	27	-	-	-
	n-Decane	-	-	-	-	-	-	-	-	73	1.73	0.2	1.41
	Nitrophenyloxadiazolol	30	-	-	-	-	-	-	-		-	-	-
	n-Methylmethanethioamide	-	-	-	-	-	-	-	-	9	-	-	-
	n-Octane	-	-	-	-	-	-	-	-	91	4.59	0.41	1.67
	o-Xylene	-	-	-	-	-	-	-	-	18	-	-	-
	Phenylacetylene	-	-	-	-	-	-	-	-	36	-	-	-
	prop-2-enylbenzene	-	-	-	-	-	-	-	-	91
	Propenylbenzene	-	-	-	-	-	-	-	-	64	1.99	0.28	1.28
	Propylbenzene	-	-	-	-	-	-	-	-	91
	p-Xylene	-	-	-	-	-	-	-	-	45	-	-	-
	Salicylaldehyde	-	-	-	-	-	-	-	-	18	-	-	-
	Tetrachloroethylene	-	-	-	-	-	-	-	-	82	0.04	0	3.68
	trans-Methyl crotonate	-	-	-	-	-	-	-	-	55	0.56	0.09	1.42
Note: Compounds were presented in the table in alphabetical order. Summary statistics were not provided in case that compounds were detected in less than 50% of samples.
1. Detection frequency.
2. Culture period.
3. Geometric mean.
4. Geometric standard deviation.

## Sheet: Table S6
Table S6. Numbering of compounds in clustering analysis results for silicone gel.
Number	Aspergillus niger	Alternaria alternata	Penicillium chrysogenum
1	1,1,2,2-Tetrachloroethane	1-Butanol	1-(2-Aminophenyl) ethan-1-oneoxime
2	1-Butanol	2-Butoxyethanol	1,1,2,2-Tetrachloroethane
3	2,2,3,3-Tetramethyl butanedinitrile	2-Ethyl-1-hexanol	1-Butanol
4	2-Butenoicacid methylester	Ethyl methacrylate	2,2,3,3-Tetramethyl butanedinitrile
5	2-Butoxyethanol	Ethylene dichloride	2-Butenoicacid methylester
6	2-Ethylhexyl propionate	Isopropanol	2-Butoxyethanol
7	2-Ethyl-1-hexanol	Methyl isobutyrate	2-Ethyl-1-hexanol
8	2-Ethyl-1-hexene	Methyl methacrylate	2-Ethyl-1-hexene
9	2-Ethylhexyl acetate	n-Octane	2-Ethylhexyl acetate
10	2-Methyl-1-pentanol	Trichloroethylene	2-Methyl-1-pentanol
11	2-Methylcyclopentanone		2-Methylcyclopentanone
12	3-Methyl-2-heptene		3-Heptene
13	3-Methyl-4-heptanone		3-Methyl-2-heptene
14	6-Methylheptyl acrylate		6-Methylheptyl acrylate
15	Acetophenone		Benzaldehyde
16	Benzene		Benzene
17	Cumene		Butanal
18	Dimethylaminoacetonitrile		Cumene
19	Ethanol		Dichloromethane
20	Ethyl 2-methylpropanoate		Dimethylaminoacetonitrile
21	Ethyl acrylate		Ethanol
22	Ethyl methacrylate		Ethyl acrylate
23	Ethylbenzene		Ethyl methacrylate
24	Ethylene dichloride		Ethylbenzene
25	Isobutyronitrile		Ethylene dichloride
26	Methyl 3-methyl-2-butenoate		Isopropanol
27	Methyl acrylate		Methyl 3-methyl-2-butenoate
28	Methyl isobutyrate		Methyl acrylate
29	Methyl methacrylate		Methyl isobutyrate
30	Methyl propionate		Methyl methacrylate
31	Methyl tiglate		Methyl propionate
32	Methyl trimethylacetate		Methyl trimethylacetate
33	Methyl DL-2-methylbutyrate		Methyl-2-methylbutyrate
34	Methylacrylonitrile		Methylacrylonitrile
35	n-Decane		n-Decane
36	n-Octane		n-Octane
37	Prop-2-enylbenzene		Tetrachloroethylene
38	Propylbenzene		Toluene
39	Styrene		trans-2-Heptene
40	Toluene		trans-Methyl crotonate
41	2-Heptene		Trichloroethylene
42	Methyl crotonate		Propenylbenzene
43	Trichloroethylene
44	Propenylbenzene
